# Supplementary material for: Changes in the core species of the ant-plant network of oak forest converted to grassland: replacement of its ant functional groups
Source: PeerJ. 2022 Jul 13;10:e13679. doi: 10.7717/peerj.13679 (PMC9288171; doi:10.7717/peerj.13679)
Supplement: Data S1 — S1a. Oak forest matrix of plant-ant interactions in FBST (Flor del Bosque State Park) S1b. Grassland matrix of plant-ant interactions in FBST (Flor del Bosque State Park) [file peerj-10-13679-s001.xlsx]

## Sheet: Oak Forest
S1a. Oak forest matrix of plant-ant interactions in FBST (Flor del Bosque State Park)
Ant species		Prenolepis imparis	Temnothorax tricarinatus	Linipithema dispertitum	Dorymyrmex insanus	Pheidole hirtula	Monomorium ebenium	Pseudomyrmex pallidus	Pseudomyrmex sp.	Pheidole tepicana	Pheidole nubicola	Crematogaster sp.
Plant species	Plan/Ant codes	PRIM	TETR	LIDI	DOIN	PHHI	MOEB	PSPA	PSEU	PHTE	PHNU	CREMA
Perimenium mendezzi	PEME	154	6	1	0	0	0	2	1	0	1	0
Eupatorium deltoideum	EUDE	59	16	0	0	0	0	0	0	1	0	0
Senecio multidentatus	SEMU	61	7	2	1	0	0	0	1	0	0	0
Salvia polystachya	SAPO	14	5	0	0	1	0	0	0	0	0	0
Mimosa acualeaticarpa	MIAC	12	0	6	0	0	0	0	0	0	0	0
Opuntia spp.	OPSPP	10	2	1	0	0	4	0	0	0	0	0
Calliandra grandiflora	CAGR	12	0	0	0	0	0	0	0	0	0	0
Ipomea sp.2	IPO2	9	1	1	0	0	0	0	0	0	0	0
Conopholis alpina	COAL	4	0	1	5	0	0	0	0	0	0	0
Commelina sp.1	COM1	7	0	1	0	0	0	0	0	0	0	0
Morfo 6	MOR6	7	0	0	0	0	0	0	0	0	0	0
Tripsacum dactyloides	TRDA	7	0	0	0	0	0	0	0	0	0	0
Senecio cinerarioides	SECI	6	0	0	0	1	0	0	0	0	0	0
Arctostaphylos pungens	ARPU	5	1	1	0	0	0	0	0	0	0	0
Agave salmiana	AGSA	5	1	0	0	0	0	0	0	0	0	0
Bromelia sp.	BROM	5	0	0	1	0	0	0	0	0	0	0
Amelanchier denticulata	AMDE	5	0	0	0	0	0	0	0	0	0	0
Rhus standley	RHST	3	1	1	0	0	0	0	0	0	0	0
Metastelma angustifolium	MEAN	3	0	2	0	0	0	0	0	0	0	0
Passiflora exsudans	PAEX	4	0	0	0	0	0	0	0	0	0	0
Ipomoea hematica	IPHE	3	0	1	0	0	0	0	0	0	0	0
Gnaphalium sp.	GNAP	2	1	1	0	0	0	0	0	0	0	0
Barkleyanthus salicifolius	BASL	2	2	0	0	0	0	0	0	0	0	0
Brogniartia intermedia	BRIN	3	0	0	0	0	0	0	0	0	0	0
Cyperus sp.	CYPE	3	0	0	0	0	0	0	0	0	0	0
Morfo 8	MOR8	3	0	0	0	0	0	0	0	0	0	0
Ceanothus coeruleus	CECO	2	0	0	0	0	0	0	0	0	0	0
Cologania obovata	COOB	2	0	0	0	0	0	0	0	0	0	0
Ipomea sp. 1	IPO1	2	0	0	0	0	0	0	0	0	0	0
Agave sp.2	AGA2	1	0	1	0	0	0	0	0	0	0	0
Monnina ciliolata	MOCI	0	1	1	0	0	0	0	0	0	0	0
Castilleja sp.	CAST	1	0	0	0	0	0	0	0	0	0	0
Asteraceae	AST1	1	0	0	0	0	0	0	0	0	0	0
Agave potatorum	AGPO	1	0	0	0	0	0	0	0	0	0	0
Fabaceae 4	FAB4	1	0	0	0	0	0	0	0	0	0	0
Juniperus sp.	JUNI	1	0	0	0	0	0	0	0	0	0	0
Lilaceae	LILA	1	0	0	0	0	0	0	0	0	0	0
Morfo 7	MOR7	1	0	0	0	0	0	0	0	0	0	0
Morfo 10	MO10	1	0	0	0	0	0	0	0	0	0	0
Morfo 11	MO11	1	0	0	0	0	0	0	0	0	0	0
Agave sp.6	AGA6	0	0	1	0	0	0	0	0	0	0	0
Quercus mexicanum	QUME	0	0	0	0	0	0	0	0	0	0	1
Asteraceae 2	AST2	0	0	0	0	1	0	0	0	0	0	0
Ipomea stans	IPST	0	1	0	0	0	0	0	0	0	0	0
Solanum nigrescens	SONI	0	0	0	1	0	0	0	0	0	0	0
Sprekelia formosissima	SPFO	0	0	0	0	1	0	0	0	0	0	0
Verbesina virgata	VEVI	0	1	0	0	0	0	0	0	0	0	0

## Sheet: Grassland
S1b. Grassland matrix of plant-ant interactions in FBST (Flor del Bosque State Park)
Ant species		Camponotus rubrithorax	Pseudomyrmex sp.	Dorymyrmex insanus	Monomorium ebenium	Pseudomyrmex pallidus	Pheidole tepicana	Pheidole nubicola	Crematogaster sp.	Linepitema disperitum	Nylanderia austroccidua	Pheidole hirtula	Prenolepis imparis	Temnothorax sp.
Plant species	Plan/Ant codes	CARU	PSEU	DOIN	MOEB	PSPA	PHTE	PHNU	CREMA	LIDI	NYAU	PHHI	PRIM	TEMN
Agave potatorum	AGPO	580	44	8	5	7	5	6	0	0	0	1	0	0
Mimosa aculeaticarpa	MIAC	111	14	3	1	1	0	0	0	4	0	0	0	0
Barkleyanthus salicifolius	BASL	95	14	1	3	0	1	0	0	0	0	0	0	1
Opuntia spp.	OPSPP	57	31	3	2	4	0	1	4	0	1	1	0	0
Agave salmiana	AGSA	30	3	2	0	1	1	0	2	0	0	0	0	0
Solanum nigrescens	SONI	15	7	0	0	0	0	0	0	0	0	0	0	0
Eysenhardtia polystachya	EYPO	13	1	1	0	0	0	0	0	0	0	0	0	0
Agave sp.1	AGA1	10	1	0	0	0	0	0	0	0	0	0	0	0
Amelanchier denticulata	AMDE	6	1	1	0	1	0	0	0	0	0	0	0	0
Agave sp.4	AGA4	8	0	0	0	0	0	0	0	0	0	0	0	0
Perymenium mendezzi	PEME	7	1	0	0	0	0	0	0	0	0	0	0	0
Agave sp.2	AGA2	7	0	0	0	0	0	0	0	0	0	0	0	0
Juniperus	JUNI	5	0	0	0	0	0	0	0	0	0	0	0	0
Agave sp.3	AGA3	4	1	0	0	0	0	0	0	0	0	0	0	0
Rhus standleyi	RHST	4	1	0	0	0	0	0	0	0	0	0	0	0
Passiflora exsudans	PAEX	3	0	0	0	0	0	0	0	0	2	0	0	0
Loranthaceae	LORA	2	1	0	1	0	0	0	0	0	0	0	0	0
Poaceae	POAC	1	1	0	0	0	0	0	0	0	0	0	2	0
Stevia serrata	STSE	2	0	0	0	1	0	0	0	0	0	0	0	0
Agave sp.5	AGA5	2	0	0	0	0	0	0	0	0	0	0	0	0
Bouvardia ternifolia	BOTE	1	0	0	1	0	0	0	0	0	0	0	0	0
Dodonaea viscosa	DOVI	1	1	0	0	0	0	0	0	0	0	0	0	0
Morfo 12	MO12	1	1	0	0	0	0	0	0	0	0	0	0	0
Pinus	PINU	1	1	0	0	0	0	0	0	0	0	0	0	0
Senecio	SENE	1	1	0	0	0	0	0	0	0	0	0	0	0
Eupatorium deltoideum	EUDE	0	0	0	1	0	0	0	0	1	0	0	0	0
Commelina sp.2	COM2	0	0	0	1	0	0	0	0	0	1	0	0	0
Arctostaphylus pungens	ARPU	1	0	0	0	0	0	0	0	0	0	0	0	0
Eucalyptus	EUCA	1	0	0	0	0	0	0	0	0	0	0	0	0
Eysenhardtia	EYSE	1	0	0	0	0	0	0	0	0	0	0	0	0
Fabaceae 5	FAB5	1	0	0	0	0	0	0	0	0	0	0	0	0
Monnina schlechtendaliana	MOSC	1	0	0	0	0	0	0	0	0	0	0	0	0
Morpho 5	MOR5	1	0	0	0	0	0	0	0	0	0	0	0	0
Apocynaceae	APOC	0	0	0	1	0	0	0	0	0	0	0	0	0
Baccharis salicifollia	BASA	0	1	0	0	0	0	0	0	0	0	0	0	0
